# Supplementary material for: Wild Bird Densities and Landscape Variables Predict Spatial Patterns in HPAI Outbreak Risk across The Netherlands
Source: MDPI journal article supplement (doi:10.3390/pathogens11050549), 2022-05-06
Supplement: s1 [file s1]

# Wild Bird Densities and Landscape Variables Predict Spatial Patterns in HPAI Outbreak Risk across The Netherlands

Janneke Schreuder, Henrik J. de Knecht, Francisca C. Velkers, Armin R. W. Elbers, Julia Stahl, Roy Slaterus, J. Arjan Stegeman and Willem F. de Boer

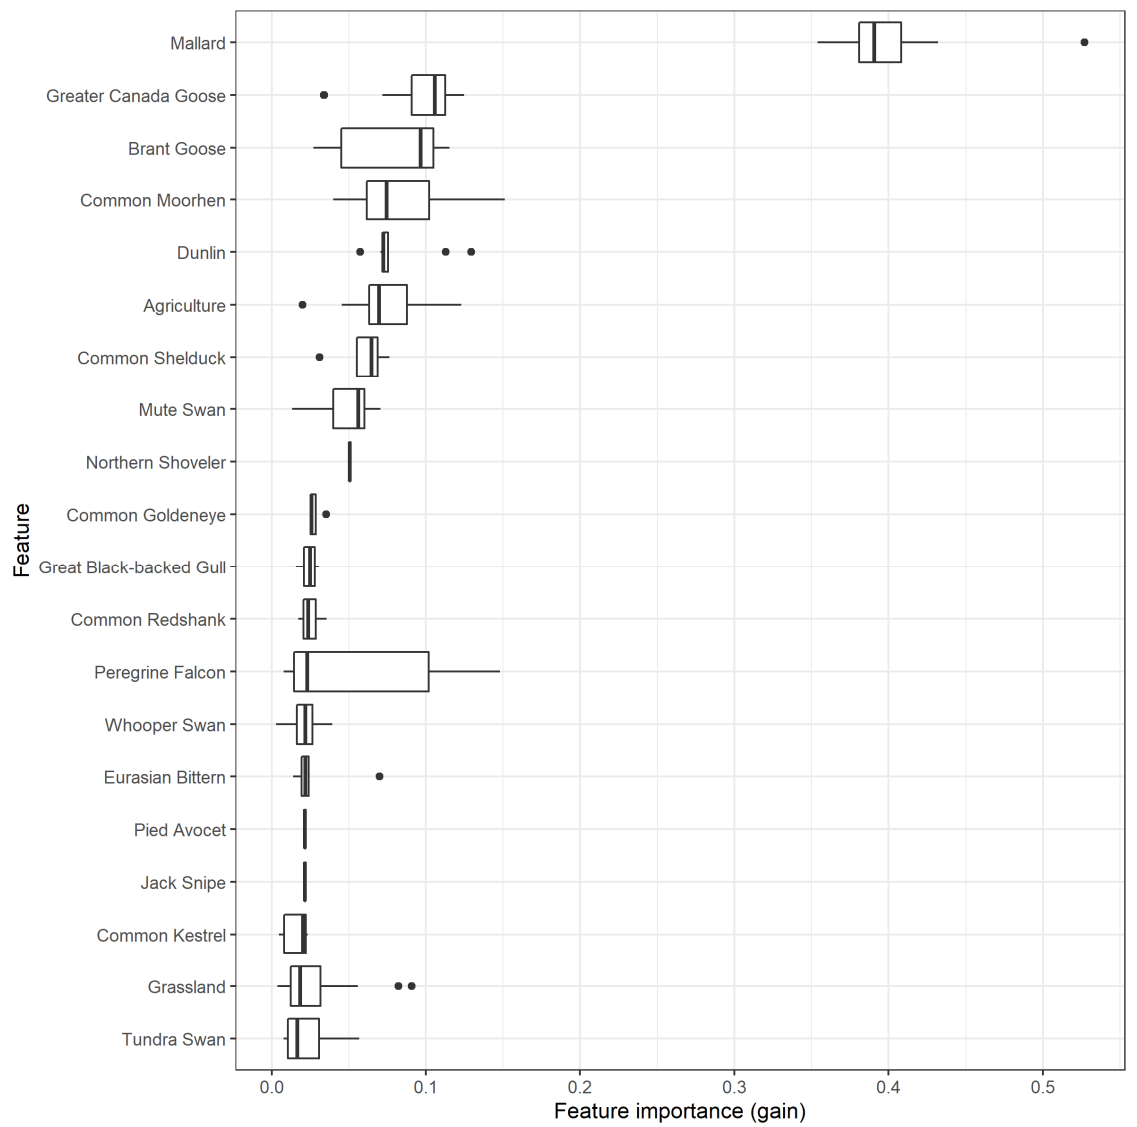

**Figure S1.** Feature importance of 20 most important scale-aggregated predictors according to the gradient boosted tree with positive monotonicity constraints.
